# Supplementary material for: Fluorescent lactose-derived catanionic aggregates: synthesis, characterisation and potential use as antibacterial agents
Source: Royal Society of Chemistry journal article supplement (doi:10.1039/c6ra02511k), 2016-01-01
Supplement: c6ra02511k1.pdf [file c6ra02511k1.pdf]

## **Fluorescent lactose-derived catanionic aggregates: synthesis, characterisation and potential use as antibacterial**

*Alexandre Bettoschi, Alain Brisson, Claudia Caltagirone, Angela M. Falchi, Francesco Isaia, Vito Lippolis, Giovanni Loi, Monica Loi, Sergio Murgia, Roberta Pilia, Corrado Serra, Sisareuth Tan*

### **General procedures**

All reactions were performed in oven-dried glassware under a slight positive pressure of nitrogen. <sup>1</sup>H-NMR (400 MHz, 500MHz) and <sup>13</sup>C NMR (100 MHz, 125MHz) spectra were determined on a Varian INOVA-400 spectrometer, and Varian INOVA-500 spectrometer. Chemical shifts for <sup>1</sup>H NMR are reported in parts per million (ppm), calibrated to the residual solvent peak set, with coupling constants reported in Hertz (Hz). The following abbreviations are used for spin multiplicity: s = singlet, d = doublet, t = triplet, m = multiplet. Chemical shifts for <sup>13</sup>C NMR are reported in ppm, relative to the central line of a septet at  $\delta = 39.52$  ppm for deuterio-dimethylsulfoxide. Infrared (IR) spectra were recorded on a NICOLET 5700 FT-IR spectrophotometer and reported in wavenumbers (cm<sup>-1</sup>). Microanalytical data were obtained using a Fisons EA CHNS-O instrument ( $T = 1000$  °C). Fluorescence spectra were recorded on a Cary Eclipse spectrofluorimeter.

## **Cryo-Transmission Electron Microscopy**

Aliquots (4  $\mu\text{L}$ ) of **Coum18** particles (2 mg/mL in water) were deposited on EM grids coated with a perforated carbon film. After draining the excess liquid with a filter paper, grids were quickly plunged into liquid ethane and mounted onto a Gatan 626 cryoholder. Cryo-TEM observation was performed with a Tecnai F20 (FEI) microscope operated at 200 kV. The images were recorded with an USC1000-SSCCD camera (Gatan).

## **Cell Culture and Live Cell Imaging**

Human cervical cell line (HeLa cells) and chinese hamster ovary cell line (CHO cells) were grown in phenol red-free Dulbecco's modified Eagle's medium (DMEM, Invitrogen, USA) with high glucose, supplemented with 10% (v/v) fetal bovine serum, penicillin (100 U mL<sup>-1</sup>), and streptomycin (100  $\mu\text{g}$  mL<sup>-1</sup>) (Invitrogen) in a 5% CO<sub>2</sub> incubator at 37 °C. Cells were seeded in number of 10<sup>5</sup> cells/cm<sup>2</sup> in 35 mm dishes and experiments were carried out 2 days after seeding. Vesicles were added to the cells at 5  $\mu\text{M}$  concentration and incubated at 37 °C for 2 h. For live cell imaging, after replacing the particle suspension with fresh serum-free medium, cells were stained for 30 min. with 650 nM Hoechst 33258, a nuclear probe used to evaluate chromatin condensation and distinguish apoptotic nuclei from healthy ones. Microscopy observations were made with 40 $\times$ /0.75 NA water-immersion objectives, using a Zeiss (Axioskop) upright fluorescence microscope (Zeiss, Oberkochen, Germany) equipped with an HBO 50 W L-2 mercury lamp (Osram, Berlin, Germany). Twelve-bit-deep images were acquired with a monochrome-cooled CCD camera (QICAM, Qimaging, Canada). Cells were visualized in contrast and fluorescence microscopy. The vesicle and Hoechst fluorescence was observed with standard fluorescein (ex 470  $\pm$  20, em 535  $\pm$  40) and blue (ex 360  $\pm$  20, em 460  $\pm$  25) filter sets, respectively. Image alignments and fluorescence measurements were obtained with Image Pro Plus software (Media Cybernetics, Silver Springs, MD).

## *Statistics*

Statistical analysis was carried out with Excel (Microsoft Co., Redmond, WA). Results were expressed as a mean  $\pm$  standard deviation (SD) of three independent experiments. Statistically significant difference was evaluated by two sample t test with  $p < 0.05$  as a minimal level of significance.

## **Antibacterial activity**

### Test-bacteria

The antibacterial activity of natural products was assessed against four bacterial strains belonging to the American Type Culture Collection (Maryland, USA): *Staphylococcus aureus* ATCC 29213, *Enterococcus faecalis* ATCC 29212, *Escherichia coli* ATCC 25922, and *Pseudomonas aeruginosa* ATCC 27853.

### Determination of Minimal Inhibitory Concentration (MIC)

A micro-dilution broth method, according to the EUCAST (VER 4.0 – June 2014, and ISO Standard 20776-1 2006 e ISO 20776-2 2007) was employed for the determination of antimicrobial activity of compound **Coum 18** and his sub-units, **2d** and **3** on 96 microwells plates;

each well contains 125  $\mu$ l of Mueller-Hinton Broth Cation-Adjusted with serial two fold dilution in concentration range 0,008 - 512  $\mu$ g/ml of the compound and then inoculated with a bacterial suspension in logarithmic phase of growth to reach a final concentration of  $2 \times 10^4$  CFU/mL.

The MIC value of each compound was determined as the lowest concentration that completely inhibited bacterial growth after 18 h of incubation at 37°C.

### Determination of Minimal Bactericidal Concentration (MBC)

For the determination of MBC, a portion of liquid (10  $\mu$ l) from each plates well that exhibited no growth were taken and then incubating on Columbia 5% sheep agar at 37°C for 24 hr. The lowest concentration that revealed no visible bacterial growth after sub-culturing was taken as MBC.

## **Experimental**

### General procedure for the synthesis of N-alkyllactosylamines **1a**, **1b**, **1c** and **1d**.

Appropriate alkylamine (4.70 mmol) suspended in propan-2-ol (40 mL) was added to a solution of D-lactose monohydrate (1 g, 2.77 mmol) in 20 mL of distilled water. The suspension was stirred for 24 h, at RT, then heated at 65°C and left under stirring for 30 min. The solvent was evaporated to

dryness. The product was purified by recrystallization in boiling EtOH and the desired product was isolated as a white powder.

#### N-dodecylactosylamine (**1a**)

Yield 58%; <sup>1</sup>H NMR (400 MHz, DMSO-<sub>d6</sub>) δ (ppm): 0.85 (t, 3H, CH<sub>3</sub>), 1.23 (m, 18H, CH<sub>2</sub>), 1.38 (m, 2H, CH<sub>2</sub>), 2.19 (sBr, 1H, NH), 2.75 and 2.92 (s, 2H, CH<sub>2</sub>NH), 3.20-3.71 (m, 14H, CHOH and CH<sub>2</sub>OH), 4.19-5.09 (m, 7H, OH)

#### N-tetradecylactosylamine (**1b**)

Yield 59%; <sup>1</sup>H NMR (400 MHz, DMSO-<sub>d6</sub>) δ (ppm): 0.85 (t, 3H, CH<sub>3</sub>), 1.24 (m, 22H, CH<sub>2</sub>), 1.38 (m, 2H, CH<sub>2</sub>), 2.23 (sBr, 1H, NH), 2.75 and 2.92 (s, 2H, CH<sub>2</sub>NH), 3.19-3.71 (m, 14H, CHOH and CH<sub>2</sub>OH), 4.19-5.08 (m, 7H, OH)

#### N-hexadecylactosylamine (**1c**)

Yield 51%; <sup>1</sup>H NMR (400 MHz, DMSO-<sub>d6</sub>) δ (ppm): 0.85 (t, 3H, CH<sub>3</sub>), 1.24 (m, 26H, CH<sub>2</sub>), 1.37 (m, 2H, CH<sub>2</sub>), 2.20 (sBr, 1H, NH), 2.78 and 2.93 (s, 2H, CH<sub>2</sub>NH), 3.24-3.71 (m, 14H, CHOH and CH<sub>2</sub>OH), 4.19-5.09 (m, 7H, OH)

#### N-octadecylactosylamine (**1d**)

Yield 53%; <sup>1</sup>H NMR (400 MHz, DMSO-<sub>d6</sub>) δ (ppm): 0.85 (t, 3H, CH<sub>3</sub>), 1.23 (m, 30H, CH<sub>2</sub>), 1.38 (m, 2H, CH<sub>2</sub>), 2.22 (sBr, 1H, NH), 2.75 and 2.92 (s, 2H, CH<sub>2</sub>NH), 3.19-3.71 (m, 14H, CHOH and CH<sub>2</sub>OH), 4.19-5.08 (m, 7H, OH)

#### General procedure for the synthesis of N-alkyllactylamines **2a**, **2b**, **2c** and **2d**.

NaBH<sub>4</sub> (0.075 g, 1.90 mmol) was added to a stirred suspension of N-alkyllactosylamines **1a**, **1b**, **1c** and **1d** (1.30 mmol) in MeOH (50 mL). The suspension was stirred for 2 hours, and then filtered to remove the unreacted N-alkyllactylamines. The filtrate was evaporated under reduced pressure to dryness to get the desired N-alkyllactylamines as white solids.

#### N-dodecylactylamines (**2a**)

Yield 96%; <sup>1</sup>H NMR (400 MHz, CD<sub>3</sub>OD) δ (ppm): 0.90 (t, 3H, CH<sub>3</sub>), 1.29 (m, 18H, CH<sub>2</sub>), 1.57 (m, 2H, CH<sub>2</sub>), 2.67 (m, 4H, CH<sub>2</sub>-NH-CH<sub>2</sub>), 3.35-4.27 (m, 13H, CHOH and CH<sub>2</sub>OH)

#### N-tetradecylactylamines (**2b**)

Yield 87%; <sup>1</sup>H NMR (400 MHz, CD<sub>3</sub>OD) δ (ppm): 0.90 (t, 3H, CH<sub>3</sub>), 1.29 (m, 22H, CH<sub>2</sub>), 1.56 (m, 2H, CH<sub>2</sub>), 2.65 (m, 4H, CH<sub>2</sub>-NH-CH<sub>2</sub>), 3.35-4.27 (m, 13H, CHOH and CH<sub>2</sub>OH)

N-hexadecyllactylamines (**2c**)

Yield 86%; <sup>1</sup>H NMR (400 MHz, CD<sub>3</sub>OD) δ (ppm): 0.89 (t, 3H, CH<sub>3</sub>), 1.29 (m, 26H, CH<sub>2</sub>), 1.56 (m, 2H, CH<sub>2</sub>), 2.65 (m, 4H, CH<sub>2</sub>-NH-CH<sub>2</sub>), 3.35-4.27 (m, 13H, CHOH and CH<sub>2</sub>OH)

N-octadecyllactylamines (**2d**)

Yield 99%; <sup>1</sup>H NMR (400 MHz, CD<sub>3</sub>OD) δ (ppm): 0.89 (t, 3H, CH<sub>3</sub>), 1.29 (m, 30H, CH<sub>2</sub>), 1.54 (m, 2H, CH<sub>2</sub>), 2.65 (m, 4H, CH<sub>2</sub>-NH-CH<sub>2</sub>), 3.35-4.27 (m, 13H, CHOH and CH<sub>2</sub>OH)

Synthesis of 11-((2-oxo-2H-chromen-7-yl)oxy) undecanoic acid (**3**)

7-hydroxycoumarin (0.518 g, 3.19 mmol) was dissolved in dry EtOH (40 mL) under N<sub>2</sub> atmosphere. K<sub>2</sub>CO<sub>3</sub> (1.325 g, 9.59 mmol), and KI (0.106 g, 0.639 mmol) were then added to the solution. A solution of 11-bromoundecanoic acid (1.101 g, 4.15 mmol) in dry EtOH (15 mL) was added dropwise and the resulting suspension was refluxed for 48 hours, then cooled down and the mixture poured into distilled water (100 mL). HCl 5% v/v was added to the solution until pH 5.0. EtOH was evaporated under reduced pressure and the residue was filtered. The resulting solid was washed with H<sub>2</sub>O (3x10 mL) and with hexane (3x10 mL) to obtain 11-((2-oxo-2H-chromen-7-yl)oxy) undecanoic acid (**3**) as an off white solid (0.762 g, 2.20 mmol, yield 69 %).

<sup>1</sup>H NMR (400 MHz, DMSO-*d*<sub>6</sub>) δ (ppm): 1.25 (m, 10H, CH<sub>2</sub>), 1.40 (m, 2H, CH<sub>2</sub>), 1.48 (m, 2H, CH<sub>2</sub>), 1.71 (m, 2H, CH<sub>2</sub>), 2.18 (t, 2H, CH<sub>2</sub>), 4.05 (t, 2H, CH<sub>2</sub>), 6.27 (d, 1H, H<sub>Arom</sub>), 6.93 (d, 1H, H<sub>Arom</sub>), 6.96 (s, 1H, H<sub>Arom</sub>), 7.61 (d, 1H, H<sub>Arom</sub>), 7.98 (d, 1H, H<sub>Arom</sub>), 11.95 (m, 1H, COOH)

IR (KBr) ν (cm<sup>-1</sup>): 2915, 2849 (C-H), 1720, 1701, 1619, 1610, 1557 (C=O)

General procedure for the synthesis of the ion-pairs **Coum12-Coum 18**.

N-alkyllactylamines (**2a**, **2b**, **2c** and **2d**) (0.29 mmol) and 11-((2-oxo-2H-chromen-7-yl)oxy) undecanoic acid (**3**) (0.100 g, 0.29 mmol) were mixed in H<sub>2</sub>O (22 mL) and left under stirring at RT for 48 hours. The suspension is then freeze dried to obtain a white powder.

**Coum 12 (4a)**

Yield 95%; <sup>1</sup>H NMR (400 MHz, CD<sub>3</sub>OD) δ (ppm): 0.90 (t, 3H, CH<sub>3</sub>), 1.29-1.33 (m, 30H, CH<sub>2</sub>), 1.49 (m, 2H, CH<sub>2</sub>), 1.60 (m, 2H, CH<sub>2</sub>), 1.81 (p, 2H, CH<sub>2</sub>), 2.15 (t, 2H, CH<sub>2</sub>), 2.94-3.07 (m, 4H, CH<sub>2</sub>-NH-CH<sub>2</sub>), 3.31 (CD<sub>3</sub>OD), 3.40-4.00 (m, 11H, CHOH and CH<sub>2</sub>OH), 4.07 (t, 2H, CH<sub>2</sub>), 4.25-4.60 (m, 2H, CHOH), 4.84 (H<sub>2</sub>O), 6.23 (d, 1H, H<sub>Arom</sub>), 6.89 (d, 1H, H<sub>Arom</sub>), 6.93 (d, 1H, H<sub>Arom</sub>), 7.53 (d, 1H, H<sub>Arom</sub>), 7.88 (d, 1H, H<sub>Arom</sub>);

<sup>13</sup>C NMR (125 MHz, CD<sub>3</sub>OD) δ (ppm): 14.42, 23.72, 26.04, 27.07, 27.73, 30.16, 30.25, 30.30, 30.37, 30.45, 30.50, 30.55, 30.63, 30.66, 30.74, 30.82, 33.06, 35.11, 39.13, 49.00 (CD<sub>3</sub>OD), 62.07, 62.51, 69.84, 70.32, 71.42, 72.58, 74.84, 75.95, 76.72, 77.09, 98.10, 102.19, 106.12, 113.17, 113.88, 114.23, 130.42, 145.84, 158.76, 163.46, 164.19, 168.64, 170.44

IR (KBr) ν (cm<sup>-1</sup>): 3390 (N-H), 2925, 2851 (C-H), 1729, 1709, 1621, 1558 (C=O)

Decomposition point : 110°C

#### **Coum 14 (4b)**

Yield 93%; <sup>1</sup>H NMR (400 MHz, CD<sub>3</sub>OD) δ (ppm): 0.90 (t, 3H, CH<sub>3</sub>), 1.29-1.33 (m, 34H, CH<sub>2</sub>), 1.49 (p, 2H, CH<sub>2</sub>), 1.60 (m, 2H, CH<sub>2</sub>), 1.81 (p, 2H, CH<sub>2</sub>), 2.16 (t, 2H, CH<sub>2</sub>), 2.92-3.08 (m, 4H, CH<sub>2</sub>-NH-CH<sub>2</sub>), 3.31 (CD<sub>3</sub>OD), 3.40-4.00 (m, 11H, CHOH and CH<sub>2</sub>OH), 4.07 (t, 2H, CH<sub>2</sub>), 4.25-4.60 (m, 2H, CHOH), 4.84 (H<sub>2</sub>O), 6.23 (d, 1H, H<sub>Arom</sub>), 6.89 (d, 1H, H<sub>Arom</sub>), 6.93 (d, 1H, H<sub>Arom</sub>), 7.53 (d, 1H, H<sub>Arom</sub>), 7.88 (d, 1H, H<sub>Arom</sub>)

<sup>13</sup>C NMR (125 MHz, CD<sub>3</sub>OD) δ (ppm): 14.43, 23.72, 26.04, 27.07, 27.77, 30.16, 30.26, 30.30, 30.37, 30.45, 30.50, 30.55, 30.64, 30.66, 30.74, 30.84, 33.06, 35.11, 39.22, 49.00 (CD<sub>3</sub>OD), 62.07, 62.57, 69.84, 70.33, 71.42, 72.58, 74.84, 75.95, 76.70, 77.08, 98.09, 102.19, 106.13, 113.17, 113.88, 114.23, 130.42, 145.84, 158.75, 163.50, 164.17, 168.73, 169.91

IR (KBr) ν (cm<sup>-1</sup>): 3400 (N-H), 2921, 2852 (C-H), 1731, 1713, 1618, 1561 (C=O)

Decomposition point : 130°C

#### **Coum 16 (4c)**

Yield 92%; <sup>1</sup>H NMR (400 MHz, CD<sub>3</sub>OD) δ (ppm): 0.90 (t, 3H, CH<sub>3</sub>), 1.29-1.33 (m, 38H, CH<sub>2</sub>), 1.49 (p, 2H, CH<sub>2</sub>), 1.60 (m, 2H, CH<sub>2</sub>), 1.81 (p, 2H, CH<sub>2</sub>), 2.16 (t, 2H, CH<sub>2</sub>), 2.85-3.09 (m, 4H, CH<sub>2</sub>-NH-CH<sub>2</sub>), 3.31 (CD<sub>3</sub>OD), 3.40-4.00 (m, 11H, CHOH and CH<sub>2</sub>OH), 4.07 (t, 2H, CH<sub>2</sub>), 4.25-4.60 (m, 2H, CHOH), 4.84 (H<sub>2</sub>O), 6.23 (d, 1H, H<sub>Arom</sub>), 6.89 (d, 1H, H<sub>Arom</sub>), 6.93 (d, 1H, H<sub>Arom</sub>), 7.53 (d, 1H, H<sub>Arom</sub>), 7.88 (d, 1H, H<sub>Arom</sub>)

<sup>13</sup>C NMR (125 MHz, CD<sub>3</sub>OD) δ (ppm): 14.43, 23.72, 26.03, 27.07, 27.79, 30.15, 30.26, 30.30, 30.36, 30.45, 30.54, 30.63, 30.65, 30.76, 30.84, 33.06, 35.10, 39.29, 49.00 (CD<sub>3</sub>OD), 61.37, 62.50,

69.84, 70.34, 72.57, 74.84, 76.71, 102.18, 106.12, 113.16, 113.88, 114.23, 130.41, 145.83, 158.86, 163.45, 164.18, 168.60, 169.93

IR (KBr)  $\nu$  ( $\text{cm}^{-1}$ ): 3406 (N-H), 2920, 2851 (C-H), 1732, 1711, 1618, 1561 (C=O)

Decomposition point : 160°C

### Coum 18 (4d)

Yield 88%;  $^1\text{H}$  NMR (400 MHz,  $\text{CD}_3\text{OD}$ )  $\delta$  (ppm): 0.90 (t, 3H,  $\text{CH}_3$ ), 1.29-1.33 (m, 42H,  $\text{CH}_2$ ), 1.49 (p, 2H,  $\text{CH}_2$ ), 1.60 (m, 2H,  $\text{CH}_2$ ), 1.81 (p, 2H,  $\text{CH}_2$ ), 2.16 (t, 2H,  $\text{CH}_2$ ), 2.77-3.10 (m, 4H,  $\text{CH}_2\text{-NH-CH}_2$ ), 3.31 ( $\text{CD}_3\text{OD}$ ), 3.40-4.00 (m, 11H,  $\text{CHOH}$  and  $\text{CH}_2\text{OH}$ ), 4.07 (t, 2H,  $\text{CH}_2$ ), 4.25-4.60 (m, 2H,  $\text{CHOH}$ ), 4.84 ( $\text{H}_2\text{O}$ ), 6.23 (d, 1H,  $\text{H}_{\text{Arom}}$ ), 6.90 (d, 1H,  $\text{H}_{\text{Arom}}$ ), 6.93 (d, 1H,  $\text{H}_{\text{Arom}}$ ), 7.53 (d, 1H,  $\text{H}_{\text{Arom}}$ ), 7.88 (d, 1H,  $\text{H}_{\text{Arom}}$ )

$^{13}\text{C}$  NMR (125 MHz,  $\text{CD}_3\text{OD}$ )  $\delta$  (ppm): 14.43, 23.72, 26.04, 27.07, 27.81, 30.15, 30.31, 30.36, 30.45, 30.54, 30.65, 30.75, 30.85, 33.06, 39.32, 49.00 ( $\text{CD}_3\text{OD}$ ), 61.38, 62.55, 69.84, 72.70, 74.99, 76.68, 102.18, 113.15, 114.23, 130.42, 145.84, 158.75, 163.50, 164.17, 168.80, 169.86

IR (KBr)  $\nu$  ( $\text{cm}^{-1}$ ): 3423 (N-H), 2919, 2850 (C-H), 1731, 1711, 1618, 1562 (C=O)

Decomposition point : 200°C

### IR characterization

The formation of the desired compounds was demonstrated by means of infrared spectroscopy by comparing the spectrum of the carboxylic coumarin derivative **3** with that of the **Coum 12 - Coum 18** in the 1750-1550  $\text{cm}^{-1}$  region (Figure 1). The shift of the band of the carboxylic acid at 1720  $\text{cm}^{-1}$  and 1701  $\text{cm}^{-1}$  and the disappearance of the band at 1610  $\text{cm}^{-1}$  confirmed the formation of the salt.<sup>14</sup>

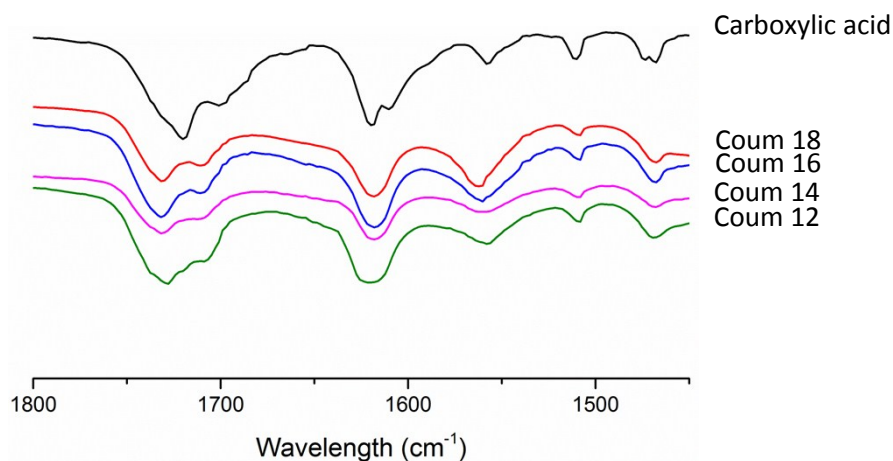

Figure S1: Comparison of the IR spectra of the C=O stretching region of the carboxylic acid **3**, and of **Coum12**, **Coum14**, **Coum16**, and **Coum18**.

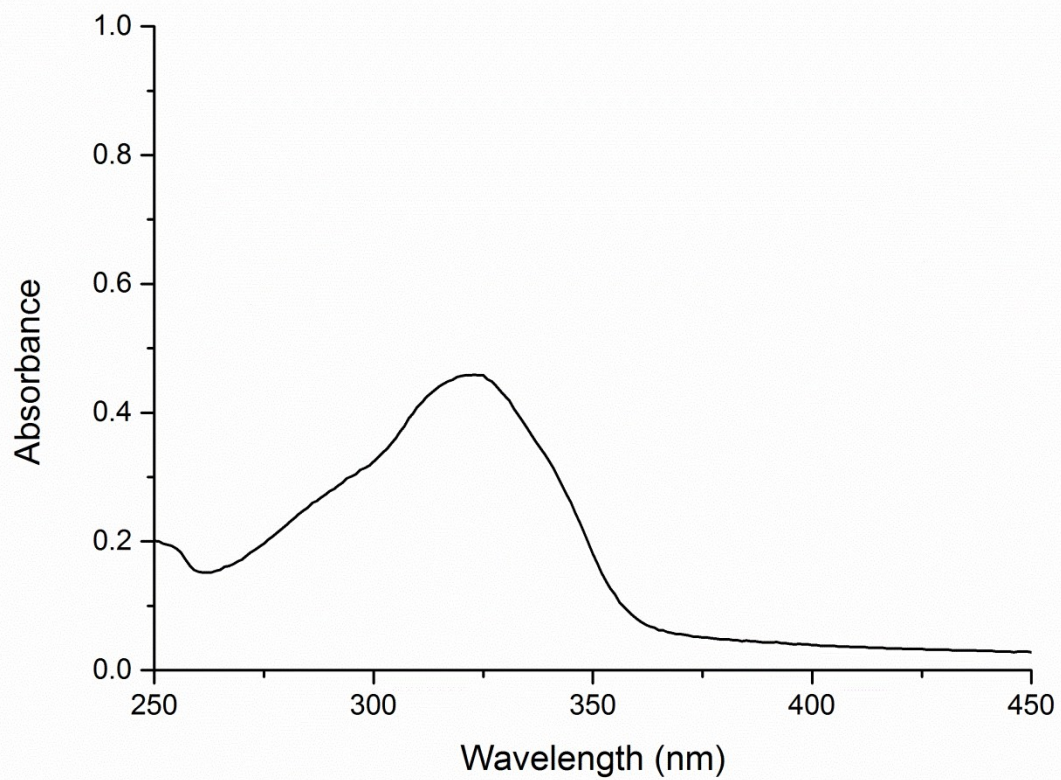

**Figure S2** UV-Vis spectrum of **Coum 18** ( $3.5 \cdot 10^{-5}$  M) in water at pH 7.5.



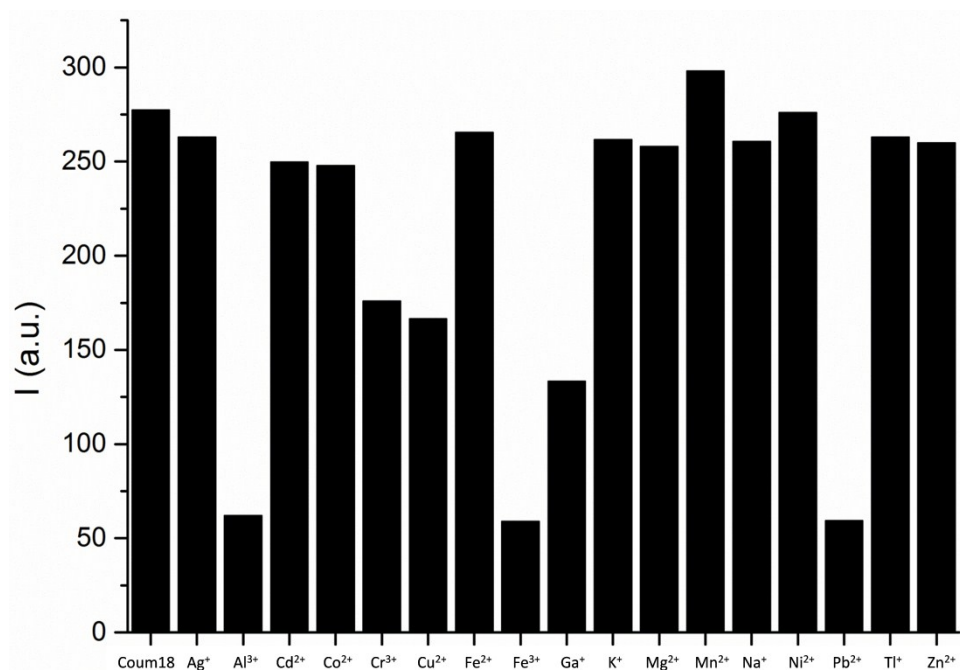

Figure S3 Changes in the emission intensity of **Coum18** ( $1.0 \cdot 10^{-7}$  M) in water at pH 7.5 upon addition of one equivalent of metal ions ( $\text{Ag}^+$ ,  $\text{Al}^{3+}$ ,  $\text{Cd}^{2+}$ ,  $\text{Co}^{2+}$ ,  $\text{Cr}^{3+}$ ,  $\text{Cu}^{2+}$ ,  $\text{Fe}^{2+}$ ,  $\text{Fe}^{3+}$ ,  $\text{Ga}^+$ ,  $\text{K}^+$ ,  $\text{Mg}^{2+}$ ,  $\text{Mn}^{2+}$ ,  $\text{Na}^+$ ,  $\text{Ni}^{2+}$ ,  $\text{Pb}^{2+}$ ,  $\text{Tl}^+$  and  $\text{Zn}^{2+}$ ) at ( $\lambda_{\text{exc}} = 324$  nm,  $\lambda_{\text{exc}} = 394$  nm).

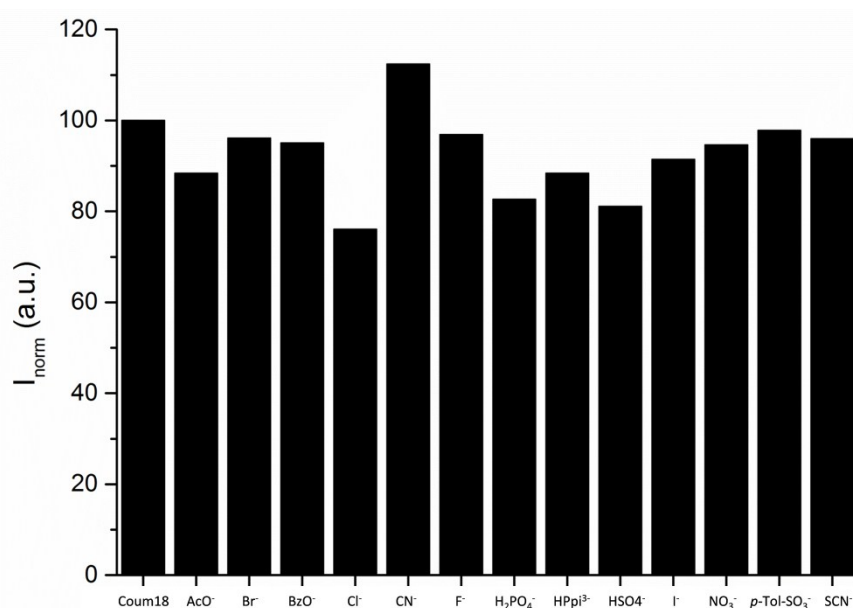

Figure S4 Changes in the emission intensity of **Coum18** in water ( $1.0 \cdot 10^{-7}$  M) in water at pH 7.5 upon addition of one equivalent of anions ( $\text{AcO}^-$ ,  $\text{Br}^-$ ,  $\text{BzO}^-$ ,  $\text{Cl}^-$ ,  $\text{CN}^-$ ,  $\text{F}^-$ ,  $\text{H}_2\text{PO}_4^-$ ,  $\text{HPpi}^{3-}$ ,  $\text{HSO}_4^-$ ,  $\text{I}^-$ ,  $\text{NO}_3^-$ ,  $\text{SCN}^-$ ,  $\text{p-Tol-SO}_3^-$ ) ( $\lambda_{\text{exc}} = 324$  nm,  $\lambda_{\text{exc}} = 394$  nm).
